# Supplementary material
Source: Royal Society of Chemistry journal article supplement (doi:10.1039/d6ta00380j)
Supplement: d6ta00380j1.pdf [file d6ta00380j1.pdf]

SI

**Photothermal–Excitonic Trade-Off in TiO<sub>2</sub>/BiCuSeO Heterojunctions for Optimal Solar-Driven Hydrogen Production**

Seiya Motoki<sup>1</sup>, Jinqiang Zhang<sup>1,2,\*</sup>, Jingkai Lin<sup>1</sup>, Kunsheng Hu<sup>1</sup>, Xiaoguang Duan<sup>1,\*</sup>, Shaobin Wang<sup>1,\*</sup>

<sup>1</sup>School of Chemical Engineering, Adelaide University, Adelaide, SA 5005, Australia

<sup>2</sup>School of Molecular Sciences, The University of Western Australia, Perth, WA 6009, Australia

Email address:           jinqiang.zhang@uwa.edu.au,           xiaoguang.duan@adelaide.edu.au,  
shaobin.wang@adelaide.edu.au

SI

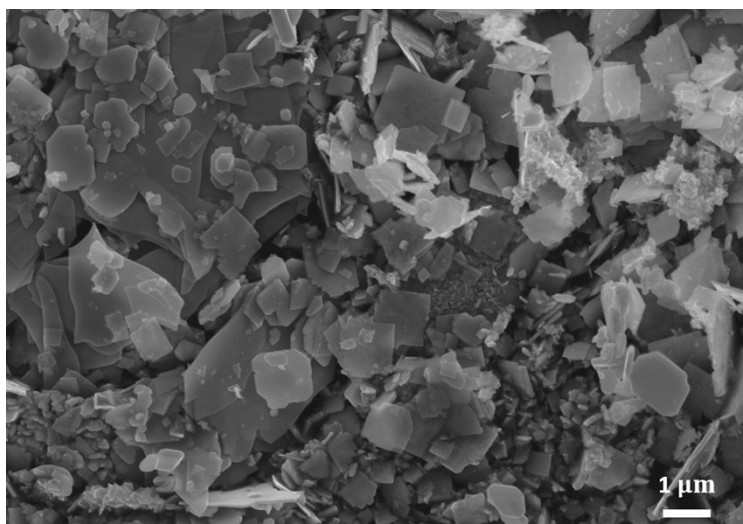

**Figure S1.** SEM image of BiCuSeO nanosheets.

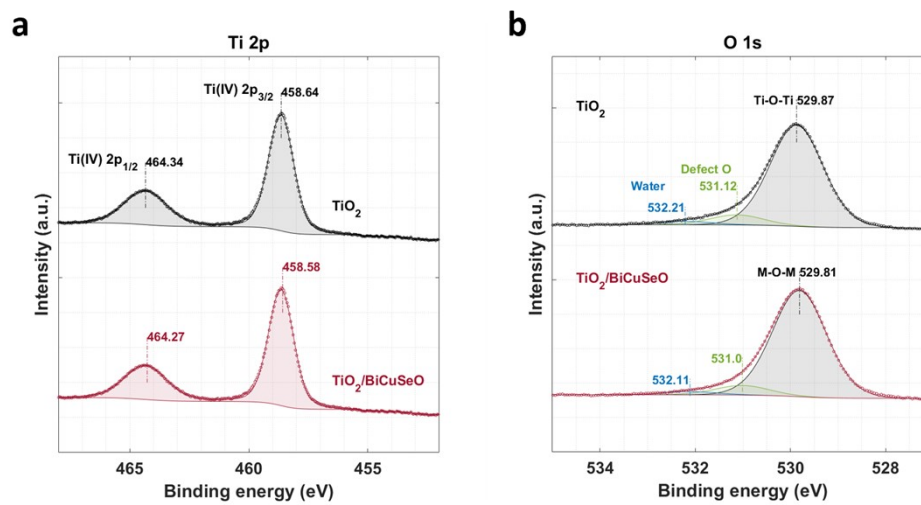

**Figure S2.** XPS spectra for  $\text{TiO}_2$  and  $\text{TiO}_2/\text{BiCuSeO}$  in **a)** Ti 2p and **b)** O 1s regions.

**Table S1.** Summary of PGEC-integrated photothermal catalytic HER performance.

| Compounds                                                                     | Light source                | Reagent                                                               | Performance                                | Ref. |
|-------------------------------------------------------------------------------|-----------------------------|-----------------------------------------------------------------------|--------------------------------------------|------|
| <b>Bi<sub>2</sub>Te<sub>3</sub> NRs/TiO<sub>2</sub></b>                       | 365 nm LED                  | 25 vol% ethanol aq.                                                   | 1494 $\mu\text{mol h}^{-1} \text{g}^{-1}$  | [1]  |
| <b>Bi<sub>2</sub>Se<sub>3</sub> NSs/CdS</b>                                   | >420 nm<br>300 W Xe lamp    | ~1 M Na <sub>2</sub> S + 0.25 M Na <sub>2</sub> SO <sub>3</sub> aq.   | 424 $\mu\text{mol h}^{-1} \text{g}^{-1}$   | [2]  |
| <b>Bi<sub>2</sub>Te<sub>3</sub> NSs</b>                                       | 100 W Hg lamp               | 15 vol% TEOA aq. + 14 $\mu\text{mol}$ Eosin Y                         | 920 $\mu\text{mol h}^{-1} \text{g}^{-1}$   | [3]  |
| <b>Bi<sub>2</sub>Se<sub>3</sub> NSs/Bi<sub>2</sub>SeO<sub>2</sub></b>         | UV cut-off<br>300 W Xe lamp |                                                                       | 136 $\mu\text{mol h}^{-1} \text{g}^{-1}$   | [4]  |
| <b>0.37 wt% Pt 7.7 wt% SnSe/g-C<sub>3</sub>N<sub>4</sub></b>                  | > 420 nm, Xe                | 20 vol% MeOH aq.                                                      | 1064 $\mu\text{mol h}^{-1} \text{g}^{-1}$  | [5]  |
| <b>20 mol% Cu<sub>2</sub>Se/CdS<sub>0.95</sub>Se<sub>0.05</sub></b>           | > 400 nm, 300 W, Xe         | 5 vol% LA aq.                                                         | 570.7 $\mu\text{mol h}^{-1} \text{g}^{-1}$ | [6]  |
| <b>Au/Cu<sub>2</sub>Se yolk/shell NCs</b>                                     |                             | 0.25 M Na <sub>2</sub> S + 0.35 M Na <sub>2</sub> SO <sub>3</sub> aq. | 66.3 $\mu\text{mol h}^{-1} \text{g}^{-1}$  | [7]  |
| <b>Cu<sub>2</sub>Se/amorphous C/graphene NBs/g-C<sub>3</sub>N<sub>4</sub></b> | > 420 nm, 300 W, Xe         | 15% TEOA aq.                                                          | 127.3 $\mu\text{mol h}^{-1} \text{g}^{-1}$ | [8]  |
| <b>Cu<sub>2</sub>O/Cu<sub>2</sub>Se multilayer NWs</b>                        | > 420 nm, 300 W, Xe         | 10 vol% MeOH aq.                                                      | 28.75 $\mu\text{mol h}^{-1} \text{g}^{-1}$ | [9]  |
| <b>TiO<sub>2</sub>/BiCuSeO (This work)</b>                                    | 300 W Xe lamp               | 10 vol% methanol aq.                                                  | 1946 $\mu\text{mol h}^{-1} \text{g}^{-1}$  |      |

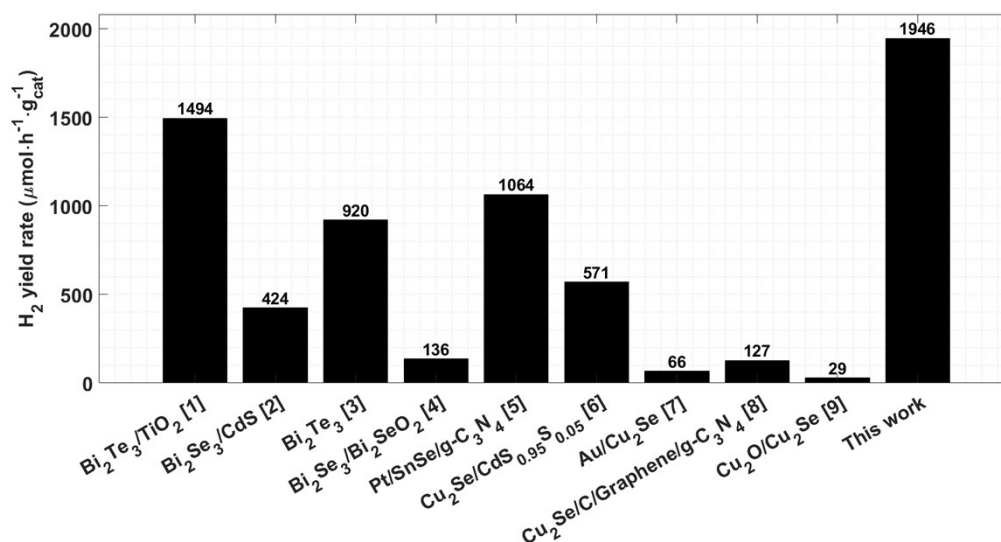**Figure S3.** PGEC-integrated photothermal catalytic HER performance reported in the literature and this work.

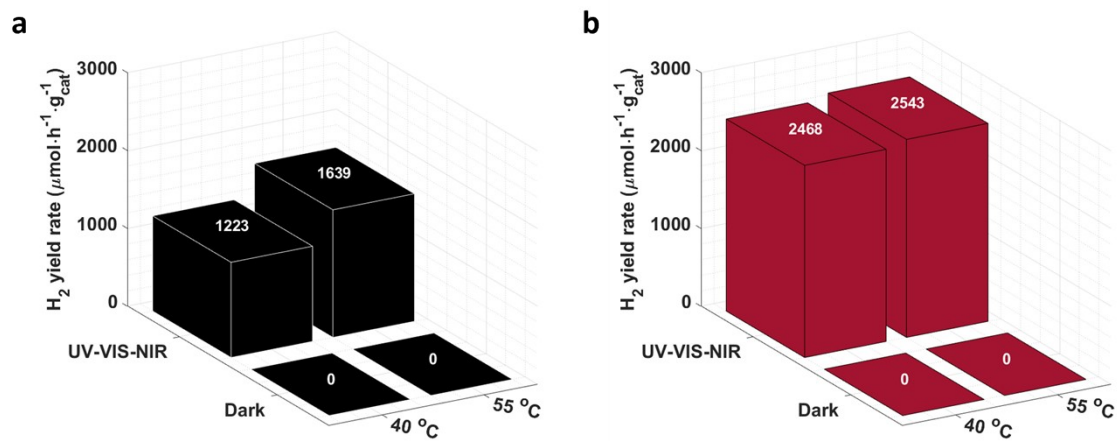

**Figure S4.** Photocatalytic HER profiles for **a)** TiO<sub>2</sub> and **b)** TiO<sub>2</sub>/BiCuSeO under variable-temperature (40 °C and 55 °C) conditions.

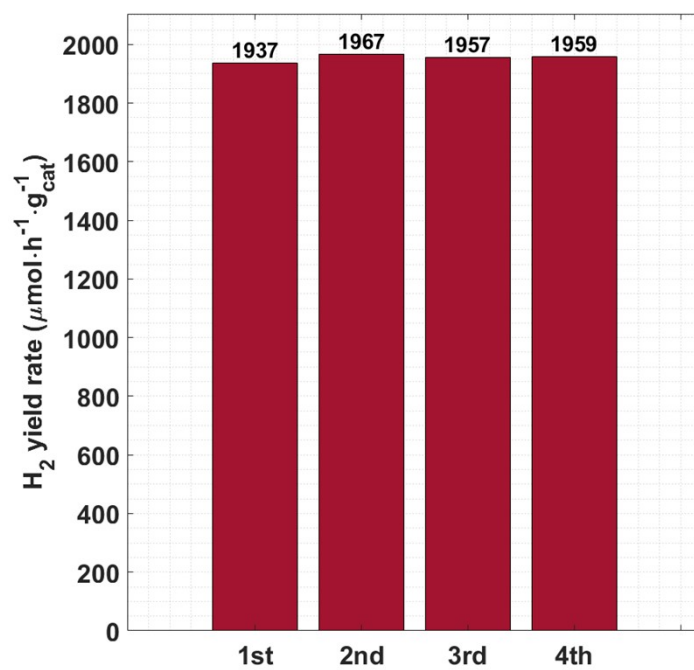

**Figure S5.** Cycling HER experiments for TiO<sub>2</sub>/BiCuSeO.

**Table S2.** Open-circuit potentials for each (photo)electrochemical analysis.

| <b>SAMPLES</b>                      | <b>OCP (V)</b> |
|-------------------------------------|----------------|
| TiO <sub>2</sub>                    | 0.267          |
| TiO <sub>2</sub> /BiCuSeO (0.5 wt%) | 0.231          |
| TiO <sub>2</sub> /BiCuSeO (2 wt%)   | 0.227          |
| TiO <sub>2</sub> /BiCuSeO (8 wt%)   | 0.225          |

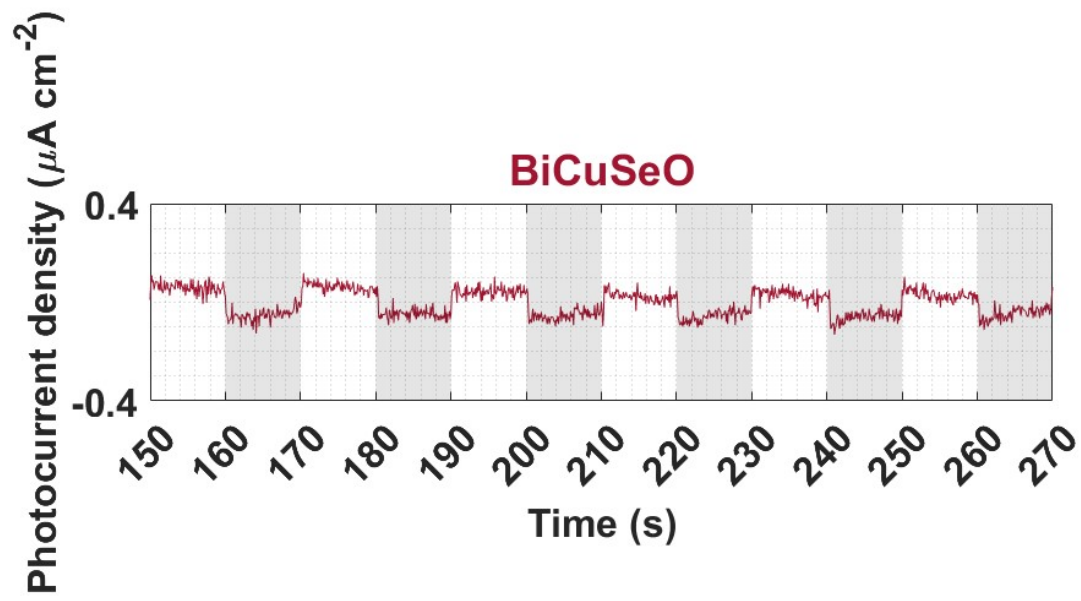

Figure S6. Transient photocurrent response for pure BiCuSeO.

## References

1. Dong, L., X. Wang, P. Wang, and H. Yu, *A one-step solvothermal synthesis of the topological insulator  $\text{Bi}_2\text{Te}_3$  nanorod-modified  $\text{TiO}_2$  photocatalyst for enhanced  $\text{H}_2$ -evolution activity*. *Journal of Materials Chemistry C*, 2022. **10**(16): p. 6402-6410.
2. Li, N., H. Fan, J. Su, Y. Gao, and L. Ge, *Ultrathin  $\text{Bi}_2\text{Se}_3/\text{CdS}$  composite for efficient photocatalytic hydrogen evolution via high interfacial charge separation and photothermal effect*. *New Journal of Chemistry*, 2022. **46**(44): p. 21409-21417.
3. Rajamathi, C.R., U. Gupta, K. Pal, N. Kumar, H. Yang, Y. Sun, C. Shekhar, B. Yan, S. Parkin, U.V. Waghmare, C. Felser, and C.N.R. Rao, *Photochemical Water Splitting by Bismuth Chalcogenide Topological Insulators*. *ChemPhysChem*, 2017. **18**(17): p. 2322-2327.
4. Wang, X., X. Yang, L. Miao, J. Gao, L. Wu, N. Wang, and X. Li, *Decoration of  $\text{Bi}_2\text{Se}_3$  nanosheets with a thin  $\text{Bi}_2\text{SeO}_2$  layer for visible-light-driven overall water splitting*. *International Journal of Hydrogen Energy*, 2018. **43**(24): p. 10950-10958.
5. Chen, P., X. Dai, P. Xing, X. Zhao, Q. Zhang, S. Ge, J. Si, L. Zhao, and Y. He, *Microwave heating assisted synthesis of novel  $\text{SnSe}/\text{g-C}_3\text{N}_4$  composites for effective photocatalytic  $\text{H}_2$  production*. *Journal of Industrial and Engineering Chemistry*, 2019. **80**: p. 74-82.
6. Du, S., G. Li, X. Lin, S. Zhang, H. Xu, and P. Fang, *Highly efficient  $\text{H}_2$  generation over  $\text{Cu}_2\text{Se}$  decorated  $\text{CdS}_{0.95}\text{Se}_{0.05}$  nanowires by photocatalytic water reduction*. *Chemical Engineering Journal*, 2021. **409**: p. 128157.
7. Lai, T.-H., C.-W. Tsao, M.-J. Fang, J.-Y. Wu, Y.-P. Chang, Y.-H. Chiu, P.-Y. Hsieh, M.-Y. Kuo, K.-D. Chang, and Y.-J. Hsu,  *$\text{Au}@\text{Cu}_2\text{O}$  Core-Shell and  $\text{Au}@\text{Cu}_2\text{Se}$  Yolk-Shell Nanocrystals as Promising Photocatalysts in Photoelectrochemical Water Splitting and Photocatalytic Hydrogen Production*. *ACS Applied Materials & Interfaces*, 2022. **14**(36): p. 40771-40783.
8. Liu, B., L. Ning, C. Zhang, H. Zheng, S.F. Liu, and H. Yang, *Enhanced Visible-Light Photocatalytic  $\text{H}_2$  Evolution in  $\text{Cu}_2\text{O}/\text{Cu}_2\text{Se}$  Multilayer Heterostructure Nanowires Having  $\{111\}$  Facets and Physical Mechanism*. *Inorganic Chemistry*, 2018. **57**(13): p. 8019-8027.
9. Liu, X., Y. Li, and P. Li, *Construction of multi-dimensional  $\text{Cu}_2\text{Se}@$ amorphous carbon@graphene nanobelt/ $\text{g-C}_3\text{N}_4$  Z-scheme heterojunctions for photocatalytic hydrogen production*. *Colloids and Surfaces A: Physicochemical and Engineering Aspects*, 2024. **686**: p. 133411.
